# Supplementary material
Source: PubMed Central journal article supplement (PMC8556359)

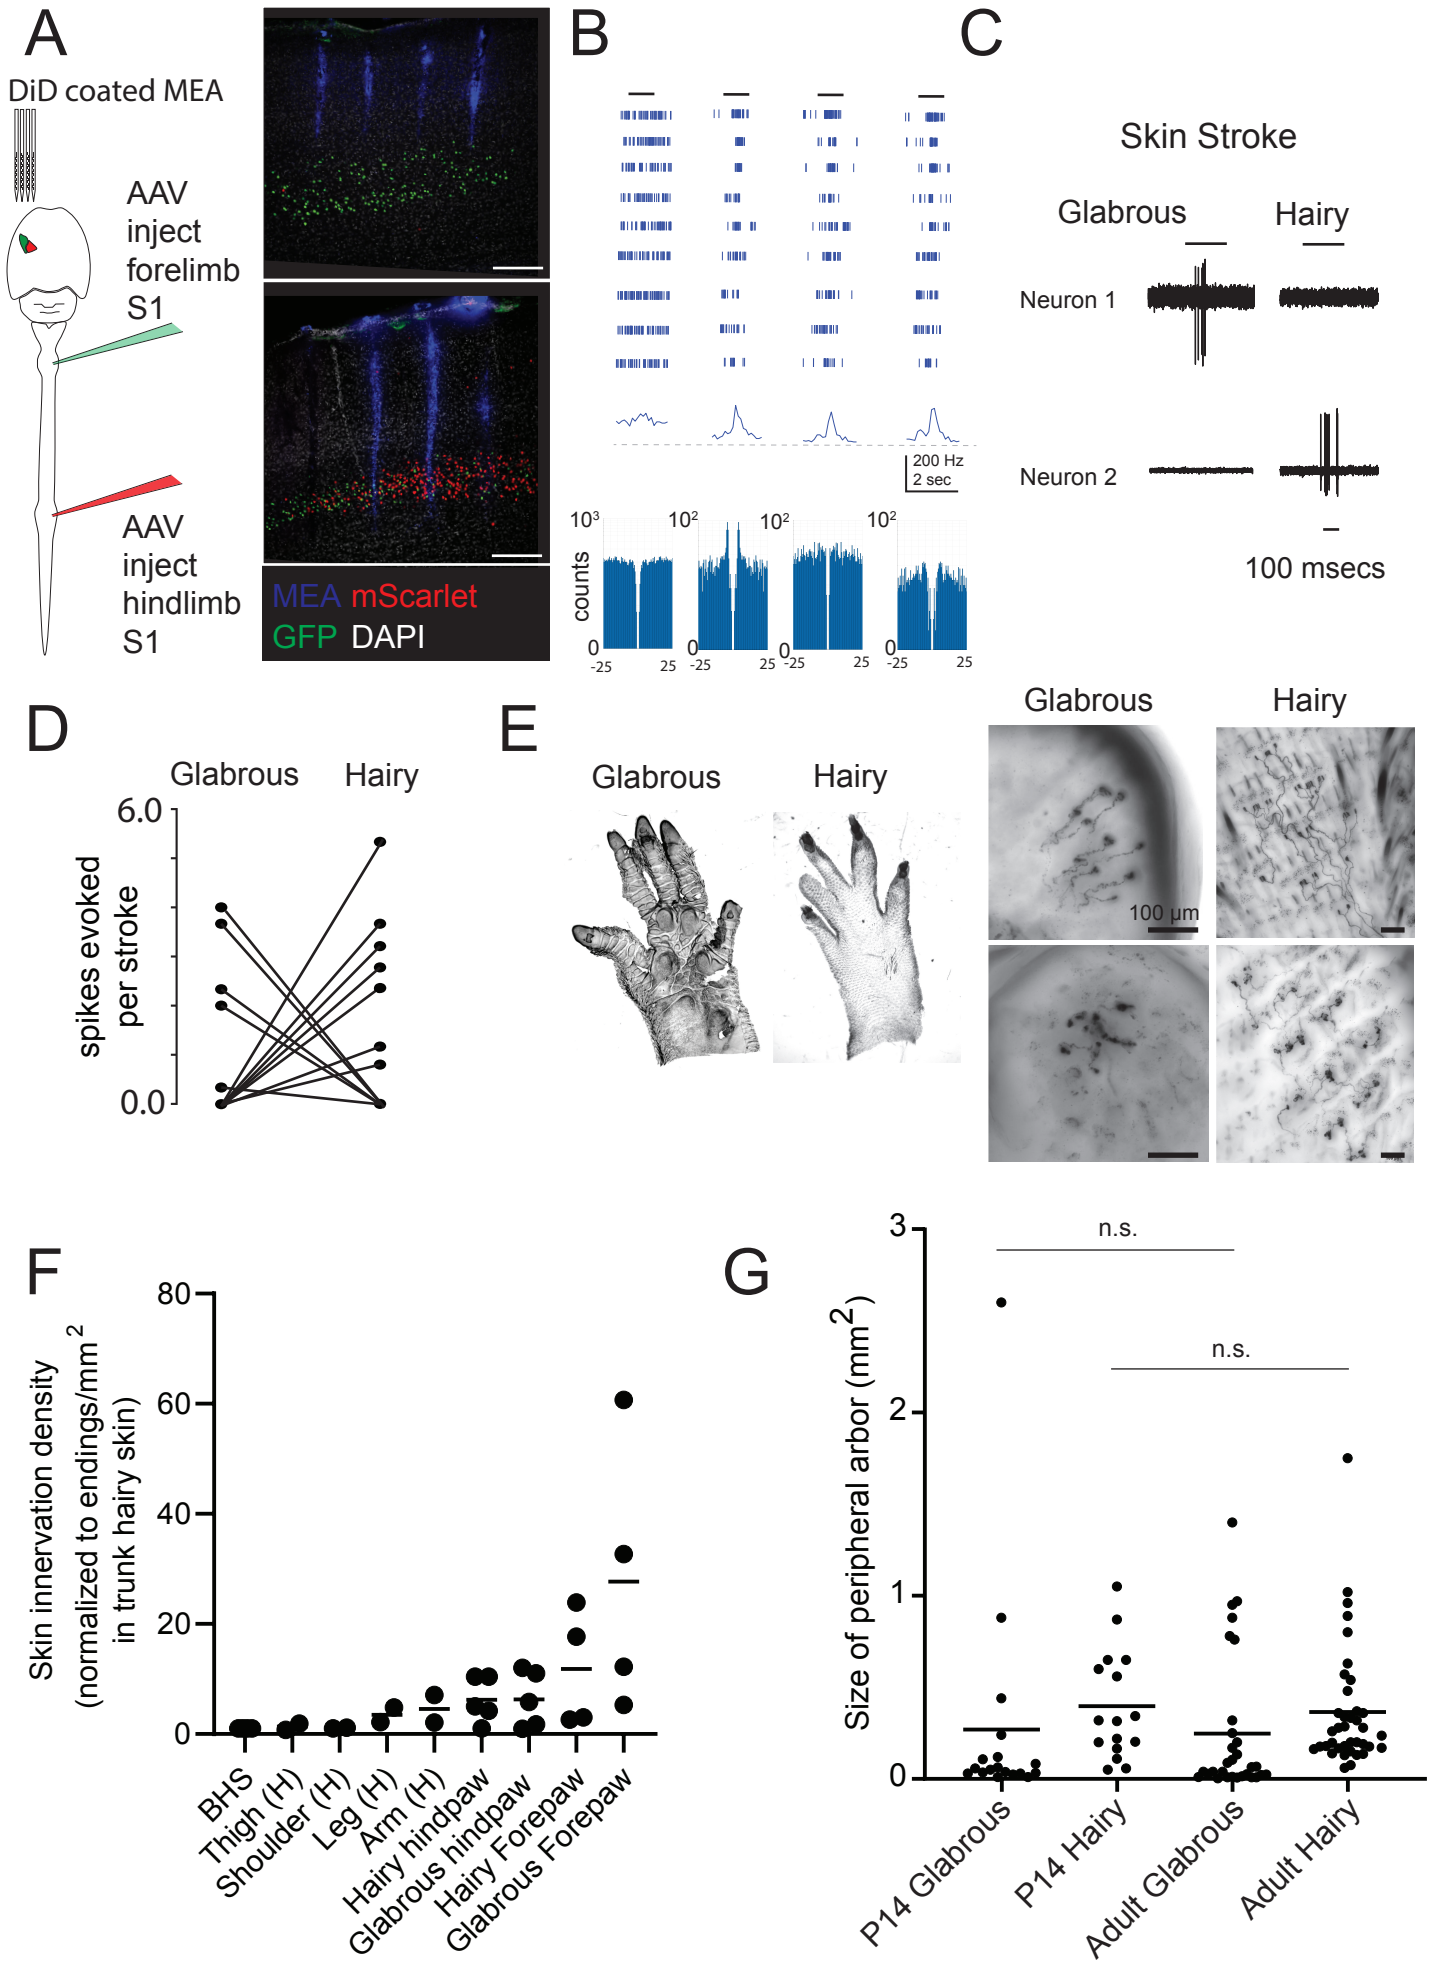

Supplement: NIHMS1742566-supplement-Fig_S1.pdf [file NIHMS1742566-supplement-Fig_S1.pdf]

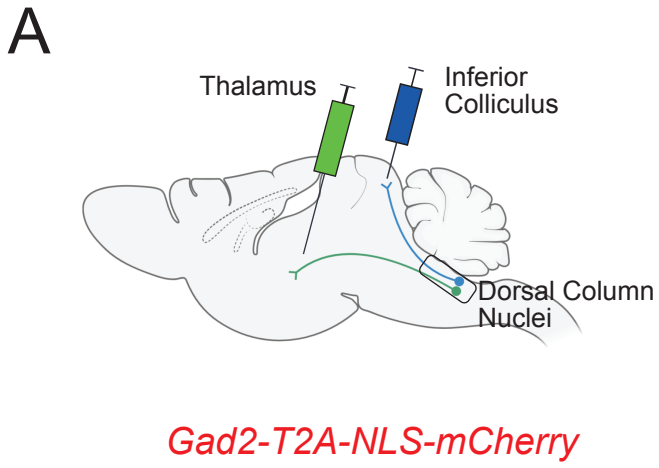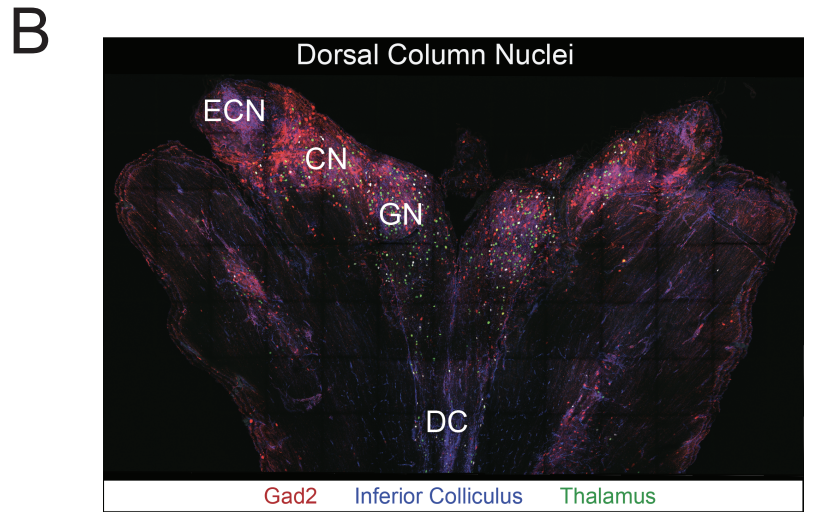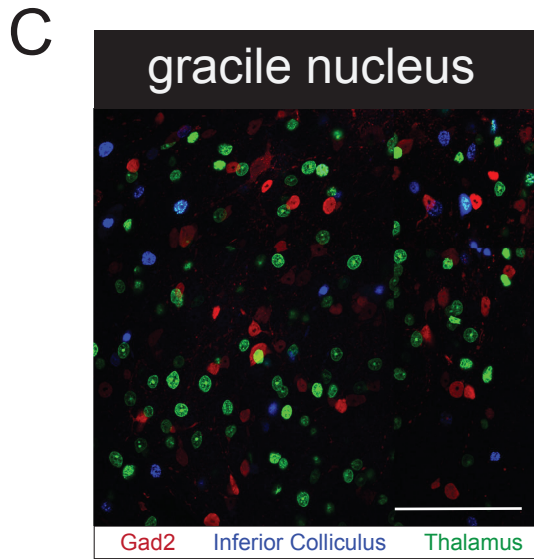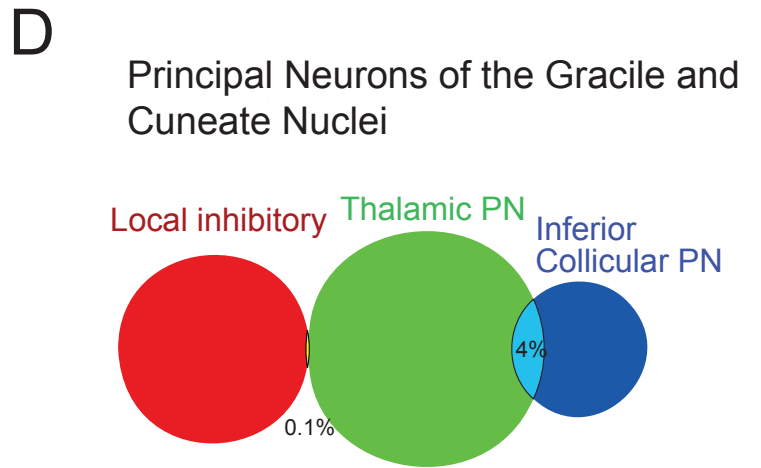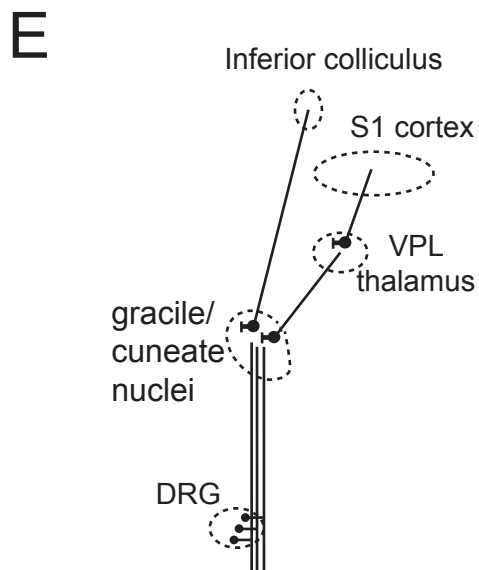

Supplement: NIHMS1742566-supplement-Fig_S2.pdf [file NIHMS1742566-supplement-Fig_S2.pdf]

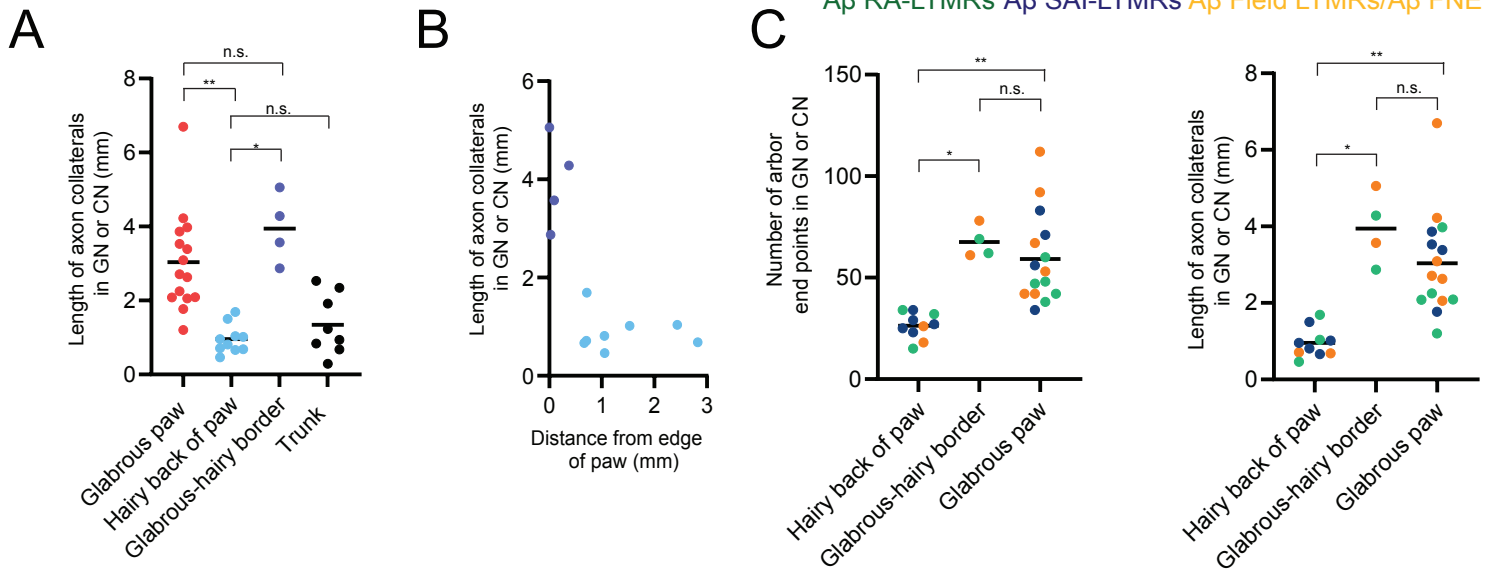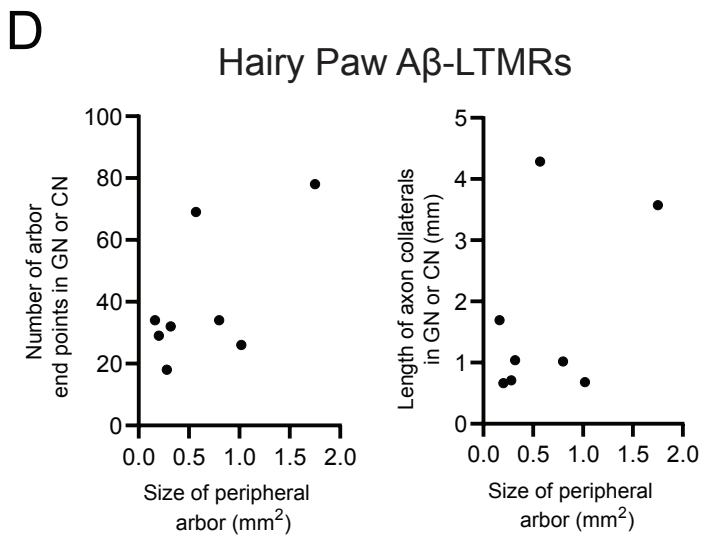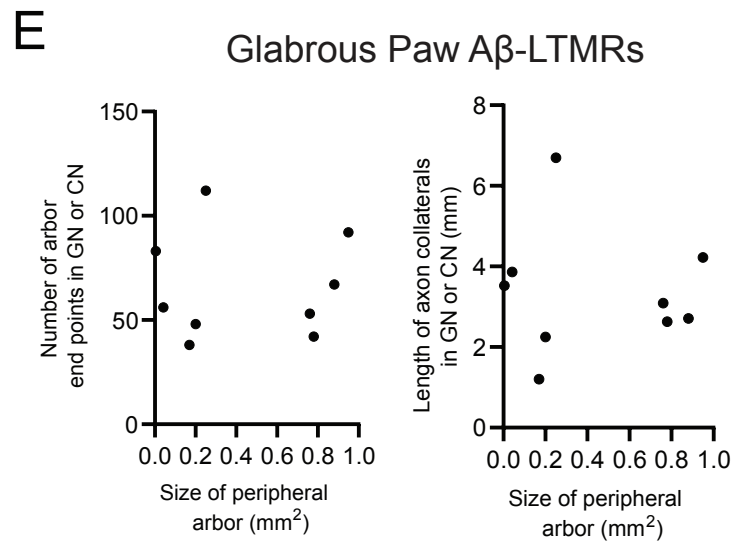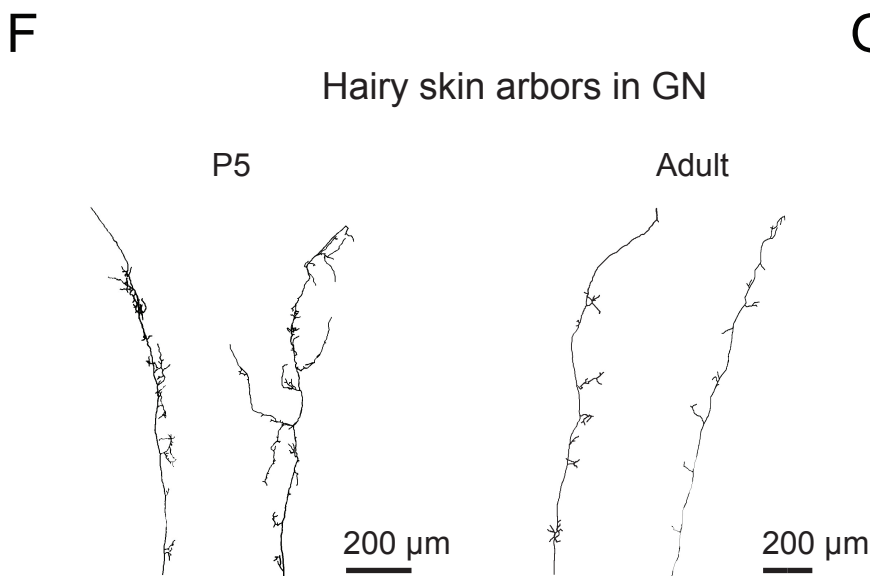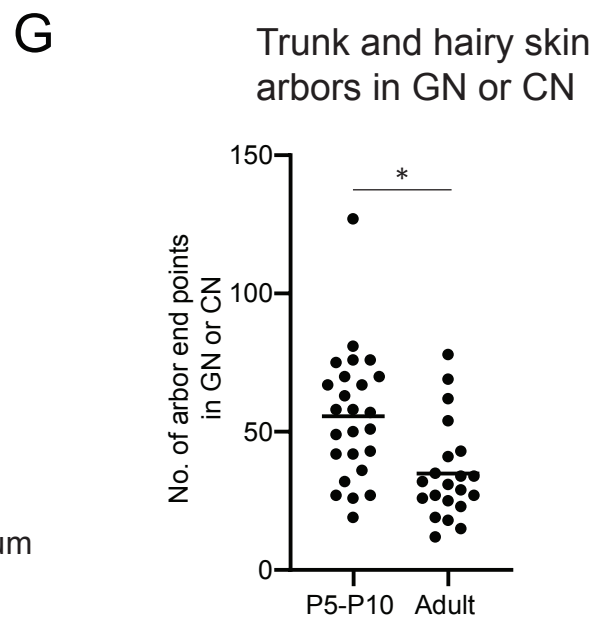

Supplement: NIHMS1742566-supplement-Fig_S3.pdf [file NIHMS1742566-supplement-Fig_S3.pdf]

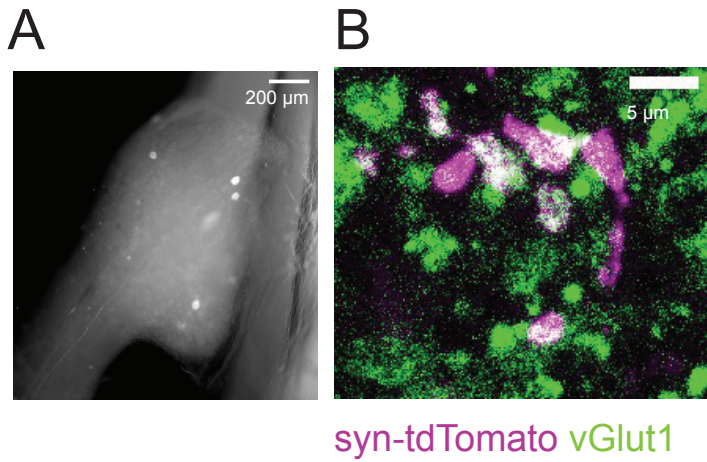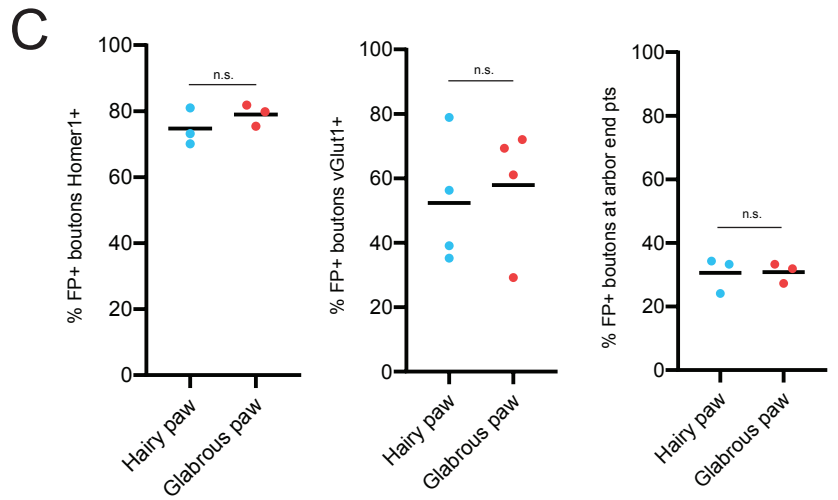

**D** Functional imaging of thalamic PNs in the gracile nucleus

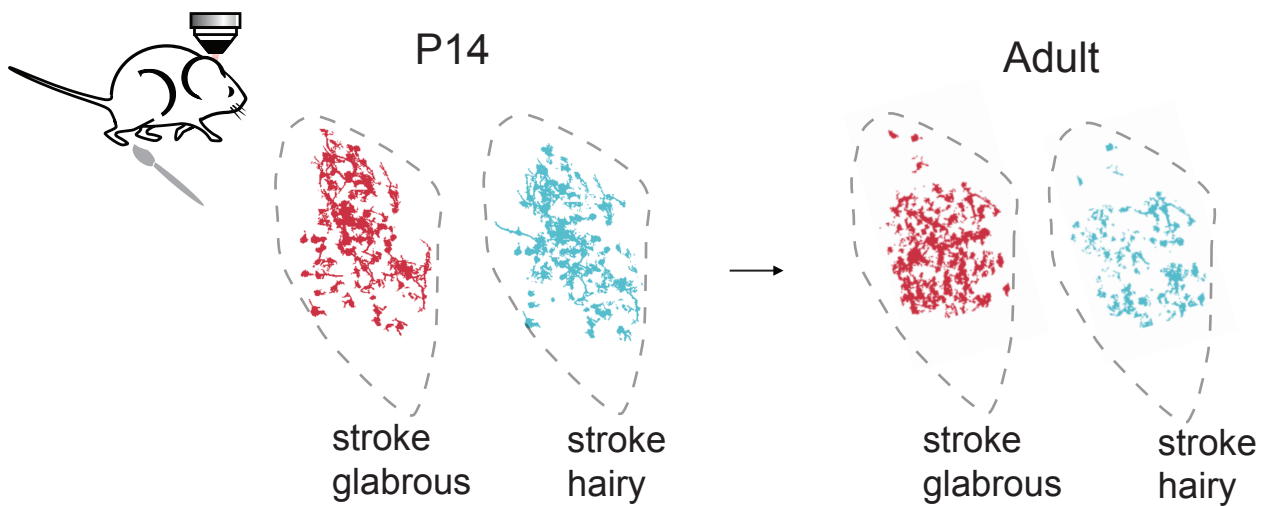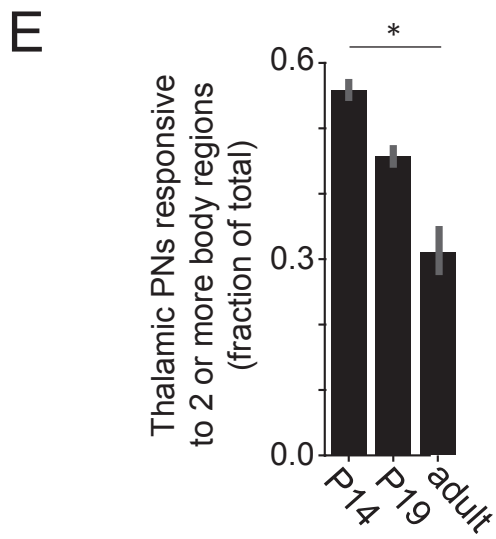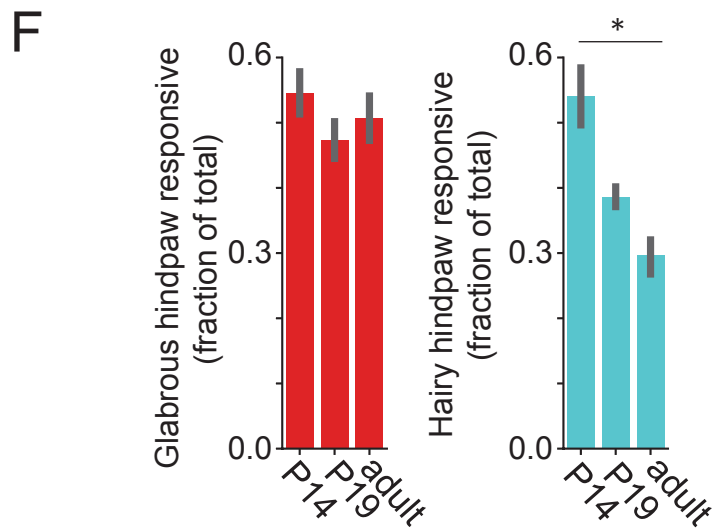

Supplement: NIHMS1742566-supplement-Fig_S4.pdf [file NIHMS1742566-supplement-Fig_S4.pdf]

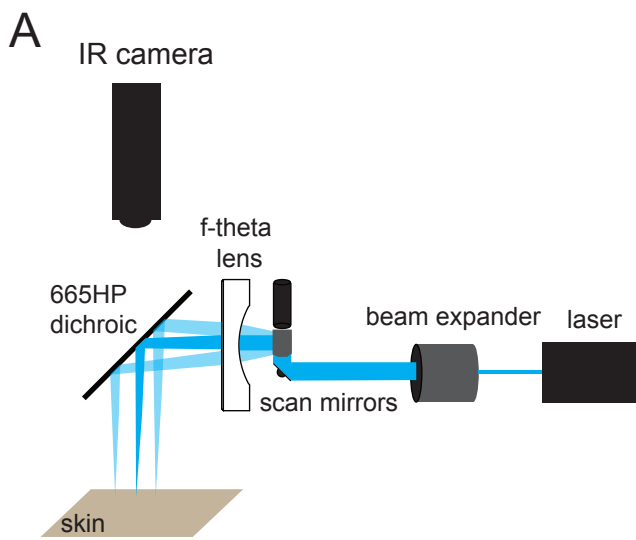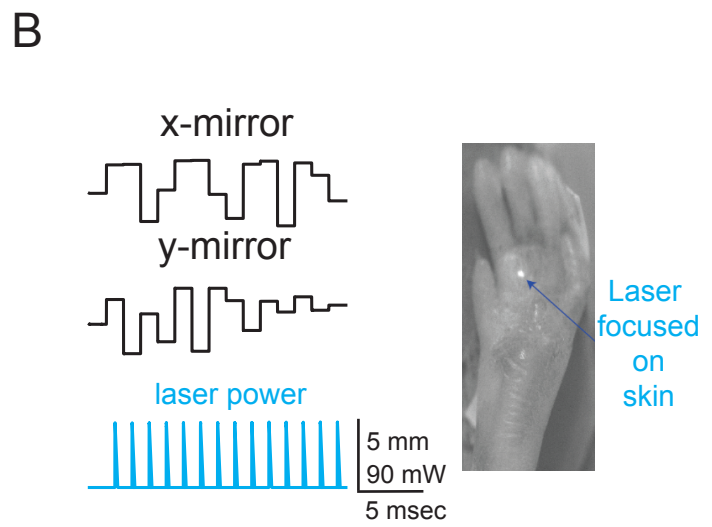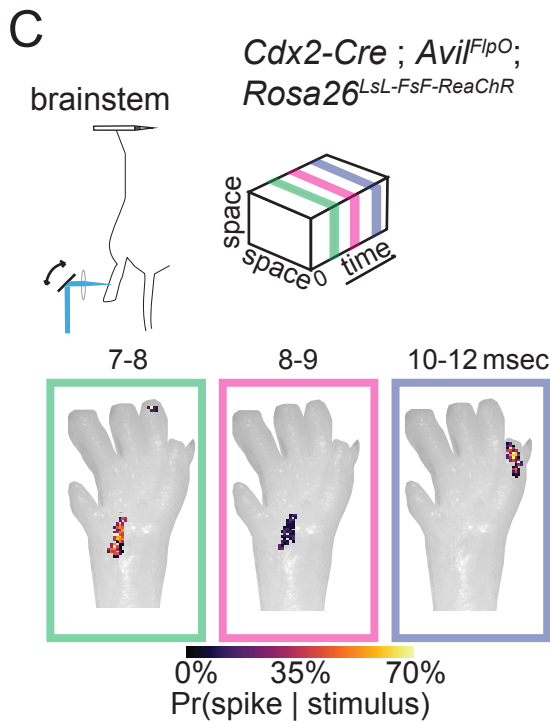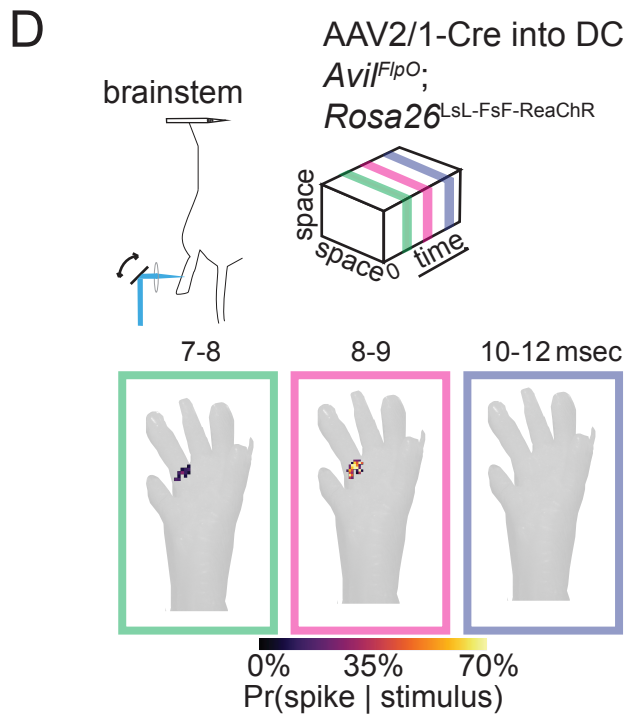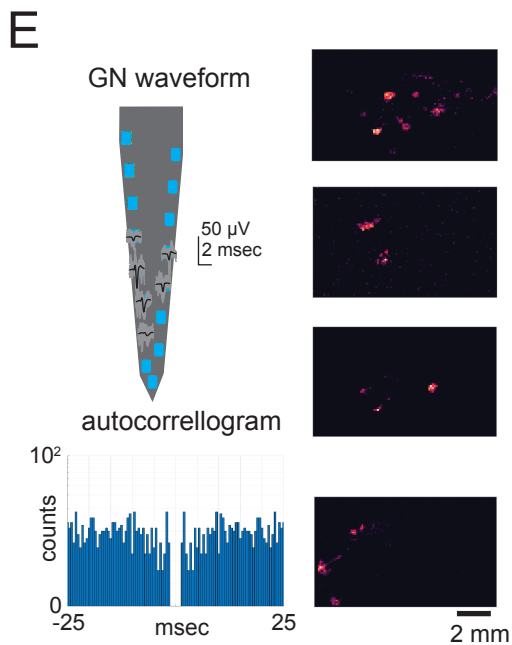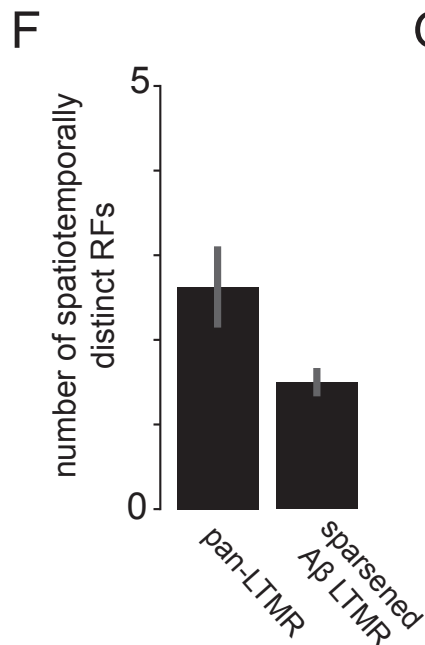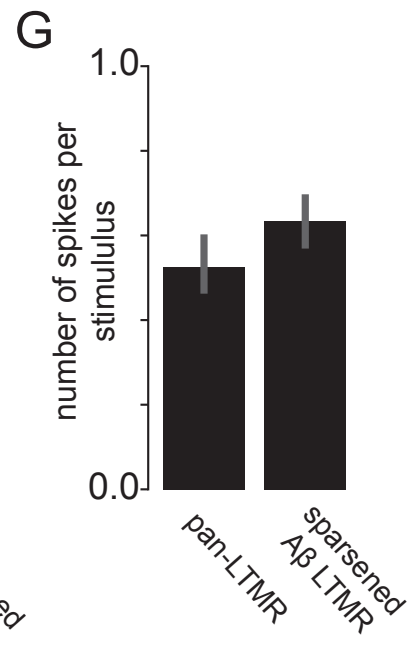

Supplement: NIHMS1742566-supplement-Fig_S5.pdf [file NIHMS1742566-supplement-Fig_S5.pdf]

A

*Ret*<sup>CreER</sup>, *R26*<sup>LsL-FsF-tdTomato</sup>; *Pvalb*<sup>FlpO</sup>; *R26*<sup>LsL-F-ChR2::YFP-F</sup>

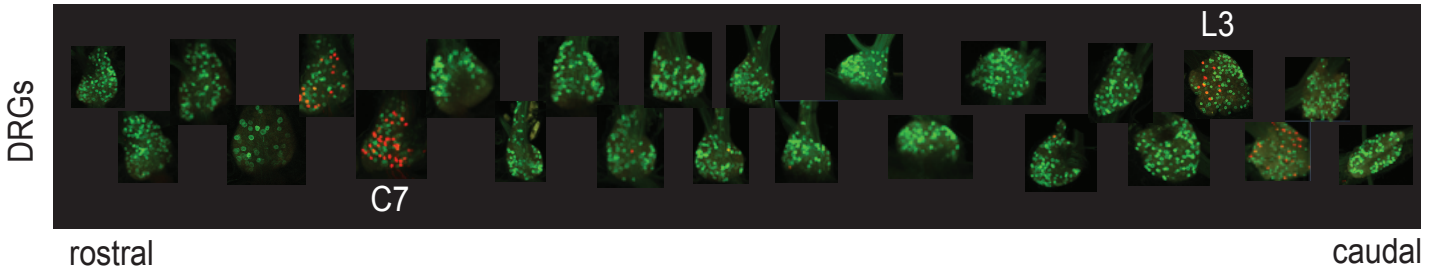

B

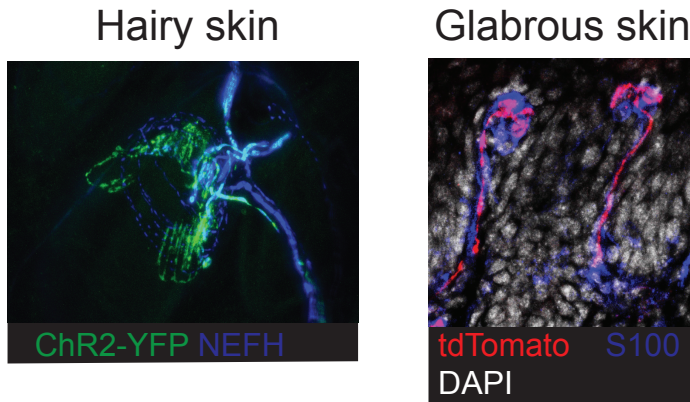

C

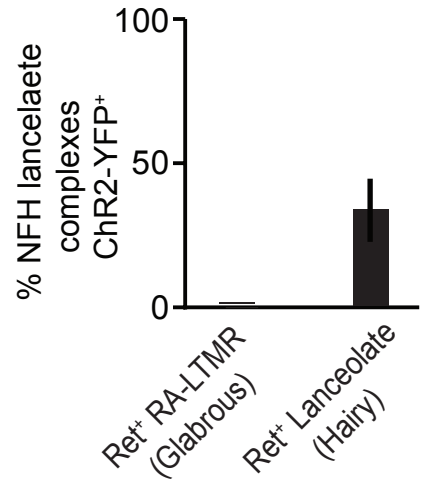

D

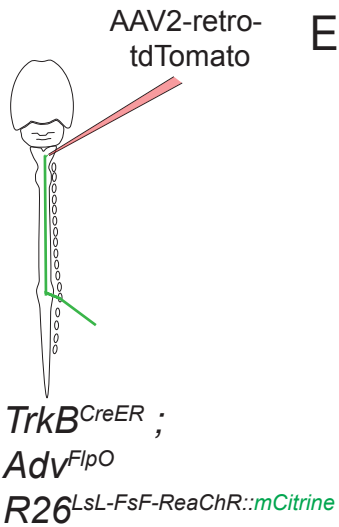

E

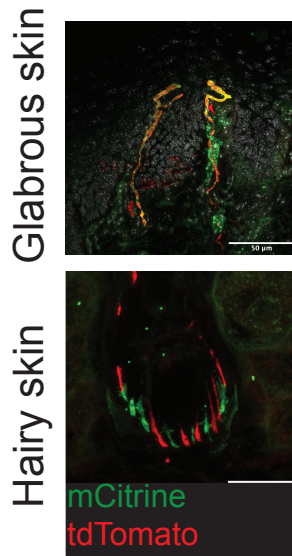

F

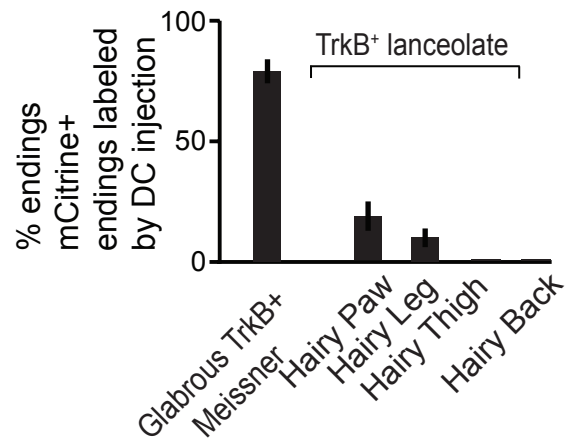

Supplement: NIHMS1742566-supplement-Fig_S6.pdf [file NIHMS1742566-supplement-Fig_S6.pdf]

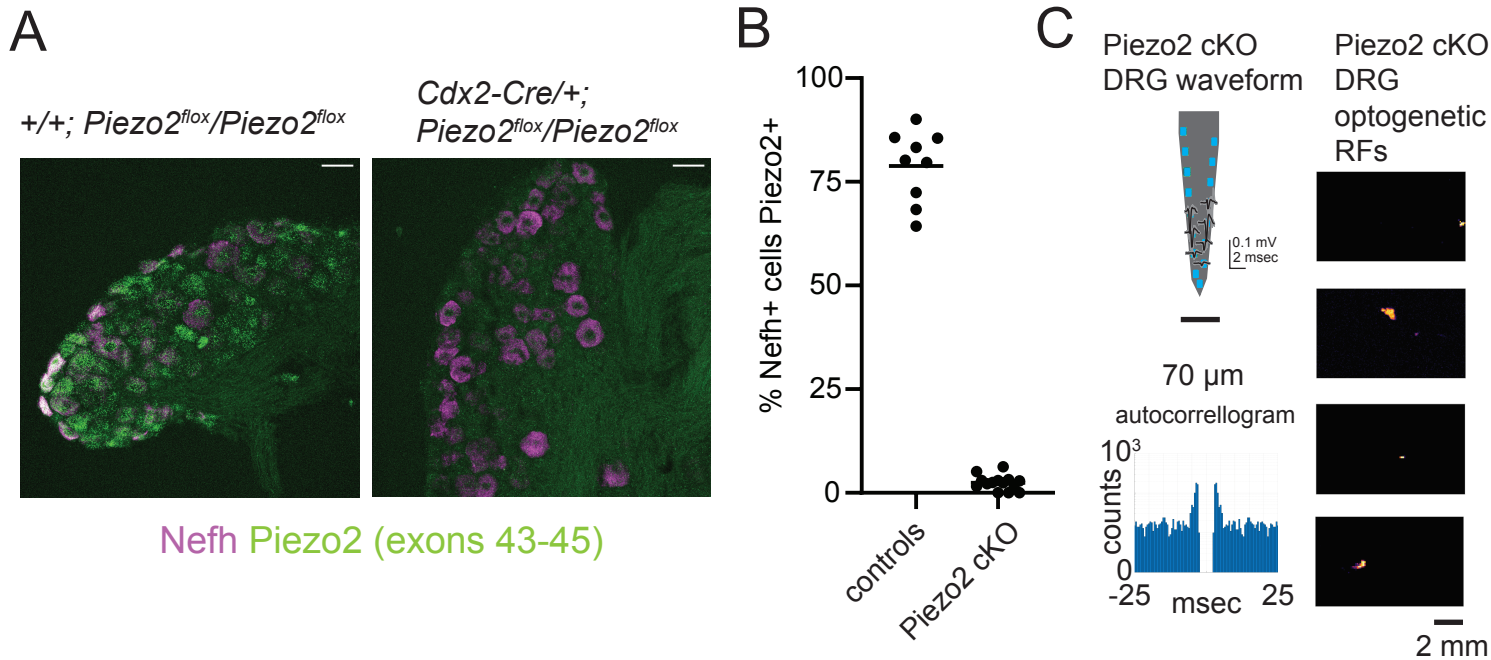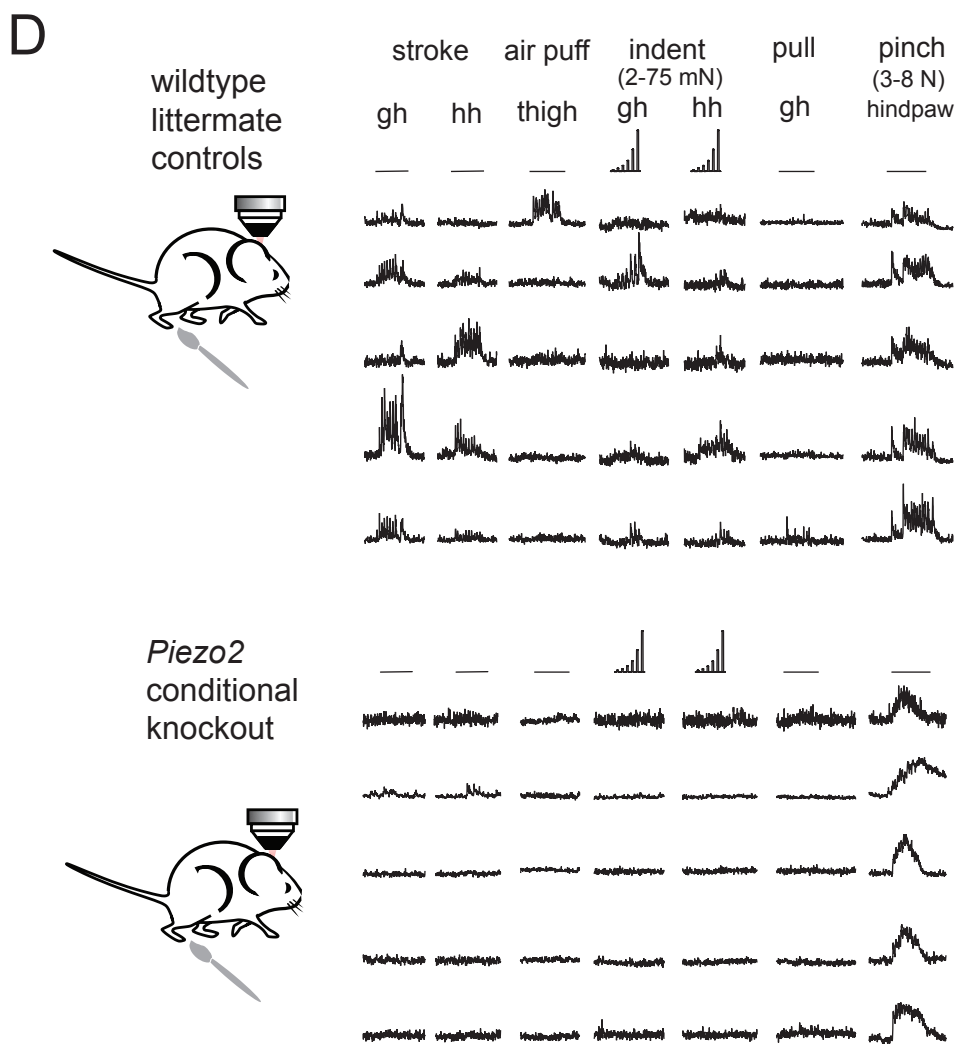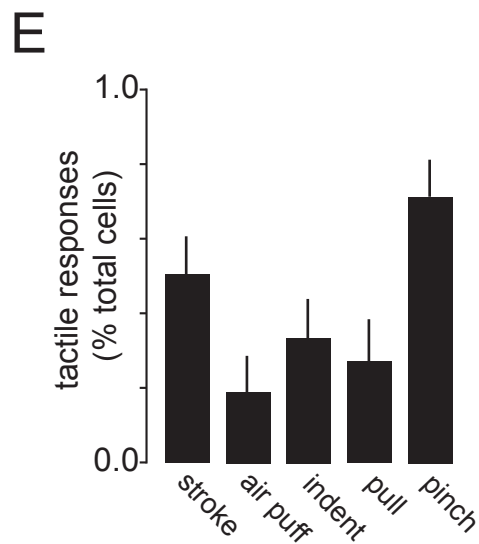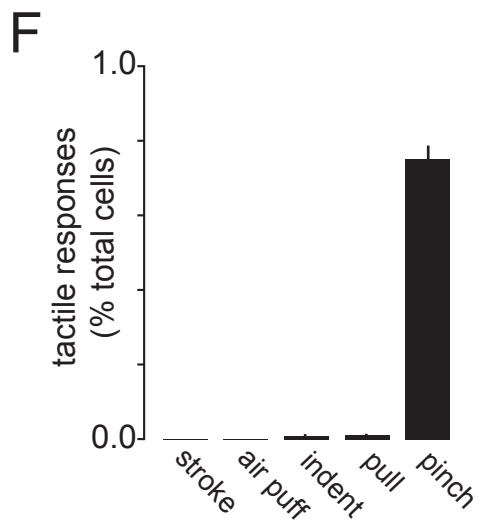

Supplement: NIHMS1742566-supplement-Fig_S7.pdf [file NIHMS1742566-supplement-Fig_S7.pdf]
